## Epidermal structures and stomatal parameters of Chinese endemic *Glyptostrobus pensilis* (Taxodiaceae)

QING-WEN MA<sup>1,2</sup>, CHENG-SEN LI FLS<sup>1\*</sup>, FENG-LAN LI<sup>2</sup> and SERGEI V. VICKULIN FLS<sup>3</sup>

<sup>1</sup>Laboratory of Systematic and Evolutionary Botany, Institute of Botany, Chinese Academy of Sciences, Beijing 100093, China

<sup>2</sup>College of Biological Sciences and Technology, Beijing Forestry University, Beijing 100083, China

<sup>3</sup>V. L. Komarov Botanical Institute, Russian Academy of Sciences, St Petersburg 197-376, Russia

Received February 2003; accepted for publication May 2004

*Glyptostrobus pensilis* K. Koch, the only living species, is endemic to southern China. Epidermal structures of *G. pensilis* have been studied on leaves collected from Guangzhou, southern China, the native locality of the species, and from Hangzhou, eastern China, the cultivated locality. Leaves are linear, linear-subulate and scale-like. Epidermal cells are rectangular and elongate parallel to the mid-vein on areas lacking stomata, and short, with rounded corners, on intrastomatal areas. Stomatal bands lie parallel to the mid-vein on both surfaces of leaves. Commonly the stomata have five or six subsidiary cells. Stomatal parameters (density and index) of the same surfaces of linear leaves from Guangzhou and Hangzhou show no statistically significant differences ( $P > 0.05$ ). Considering the stomatal parameters of the same surfaces of linear-subulate leaves between the two localities, the stomatal index of the abaxial surfaces reveals no significant differences ( $P > 0.05$ ), while the stomatal index of the adaxial surfaces and the stomatal density of both surfaces exhibit significant differences ( $P < 0.05$ ). Intra-individual variation in stomatal index is smaller than that in stomatal density based on the coefficient of variability of stomatal parameters of the same areas of leaves. When studying the correlation between stomatal parameters of *G. pensilis* and atmospheric CO<sub>2</sub> concentrations, the stomatal parameters of linear leaves are mostly significant, and stomatal index is more useful than stomatal density. © 2004 The Linnean Society of London, *Botanical Journal of the Linnean Society*, 2004, 146, 153–162.

ADDITIONAL KEYWORDS: coefficient of variability – gymnosperm – leaf – *t*-test.

### INTRODUCTION

The conifer family Taxodiaceae traditionally includes nine genera. They are widely distributed in north temperate to subtropical regions of both the Old and New Worlds, with only one genus in the Southern Hemisphere (Page, 1990; Yu, 1994, 1995). *Taxodium* is distributed southwards from north-eastern USA to Florida, Mexico and Guatemala; *Cunninghamia* occupies southern China; *Taiwania* occurs in southern China, including Taiwan, and northern Myanmar; *Cryptomeria* occurs in China and Japan; *Sequoia* and *Sequoiadendron* occur in western North America; *Glyptostrobus* and *Metasequoia* grow in southern and

central China; *Arthrotaxis* is endemic to Tasmania. All the genera in Taxodiaceae are either monotypic or consist of small and closely related species-groups (e.g. *Arthrotaxis*), and the geographical distribution of genera is one of considerable disjunction.

As an endemic Chinese genus, *Glyptostrobus* has a unique living species, *G. pensilis* K. Koch, which is naturally distributed within the Chinese provinces of Guangdong, Guangxi, Fujian and Yunnan (Fig. 1; Ying & Zhang, 1994). Trees of *G. pensilis* are also cultivated in the provinces of Jiangxi, Hunan, Sichuan, Jiangsu, Zhejiang, Anhui, Henan, Shandong, Shanghai, Hong Kong, Taiwan (Xu & Li, 1959; Jiangsu Institute of Botany, 1977; Zheng & Fu, 1978; Xu & Yu, 1980; Chen, 1992; Liu, Lu & Ou, 1994; Ying & Zhang, 1994; Huang, 1995; Yu, 1995; Chen, Yu & Miao, 1997; Han *et al.*, 1997; Ru *et al.*, 1999; Li & Zhang, 2001).

\*Corresponding author. E-mail: lics@ns.ibcas.ac.cn

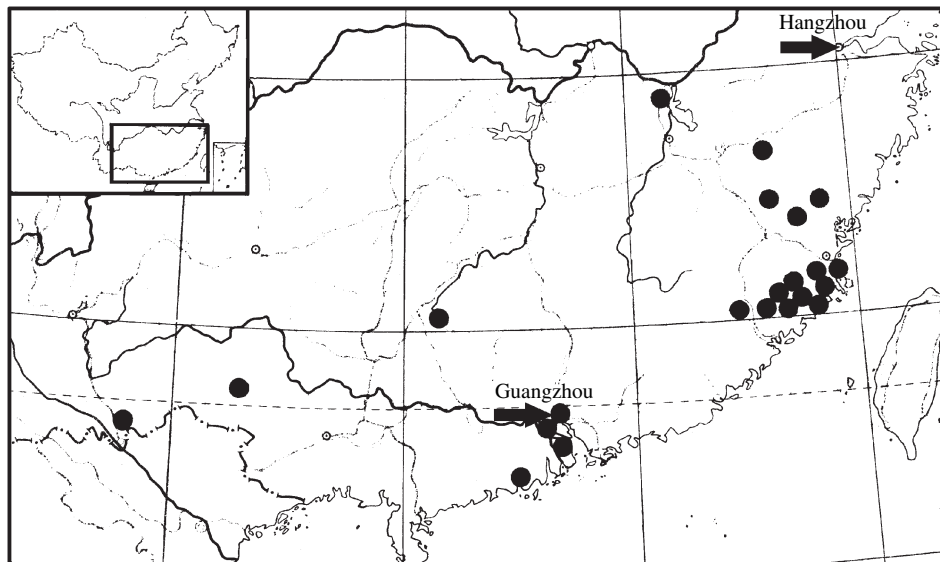

**Figure 1.** The natural distributions of *Glyptostrobus pensilis* (based on map 6 in Ying & Zhang, 1994). The arrows show the localities from which the specimens were collected.

In the fossil record of *Glyptostrobus*, *G. europaeus* (Vickulin *et al.*, 2003), *G. lineatus* (Alvin & Boulter, 1974), *G. nordenskioeldii* (Chandrasekharam, 1974; Christophel, 1976), *G. comoxensis* (Rouse, 1967), and *G. vachrameevii* (Sveshnikova, 1967) have been common in North America, continental Europe and eastern Asia since the Late Cretaceous period (Florin, 1963; Sveshnikova, 1963, 1967; Becker, 1969; Dorofeev, 1974; Christophel, 1976; Schneider, 1990; Mai, 1995; Yu, 1995). They are generally preserved as fragments of foliar shoots. In China, compression fossils of leaves and shoots, identified as *G. europaeus*, and the wood of *G. pensilis* were found from Upper Cretaceous to Upper Tertiary rocks in the provinces of Jilin, Xinjiang, Heilongjiang, Liaoning, Yunnan and Hubei (Editorial Group on Cenozoic Plants from China, 1978; Guo & Li, 1979; Shenyang Institute of Geology & Mineral Resources, 1980; Guo *et al.*, 1984; Li & Yang, 1984; Tao & Xiong, 1986; Xiong, 1986; Guo & Chen, 1989; Yang *et al.*, 1996; He & Tao, 1997; Guo, 2000).

The extent of intraspecific variation is relatively high in the macromorphology of leaf and branch structures in several genera of Taxodiaceae (Liu, Li & Wang, 1999; Ma & Gu, 2000; Ma *et al.*, 2000a; Stockey, Rothwell & Falder, 2001; Ma & Li, 2002a, b). To a certain extent, leaf epidermal characters are reflected in the structural pattern of the cuticle (Alvin, 1970; Boulter, 1970, 1971; Alvin & Boulter, 1974; Cutler, Alvin & Price, 1982) and the cuticle is the standard source of valuable cellular information in leaf-compression fossils (Kerp & Krings, 1999). Thus, epidermal features might offer additional and decisive insights into taxonomic parameters.

A few papers have described simple epidermal structures of *G. pensilis* (Florin, 1922, 1931; Sveshnikova, 1963; Zheng & Fu, 1978; Yao & Hu, 1982; Vickulin *et al.*, 2003). In this paper, the epidermal characters of three kinds of leaves of *G. pensilis* were observed under both scanning electron microscopy (SEM) and light microscopy (LM). Statistical analyses were performed to check the differences in stomatal parameters between the abaxial and adaxial surfaces of the same type of leaves from the same localities, and also to check the differences in stomatal parameters for the same kind of leaves in Guangzhou and Hangzhou. The coefficient of variabilities (CV) of stomatal density and index were compared and show that the intra-individual variation in the stomatal index is smaller than that in the stomatal density. The new data obtained from this study will provide reference material for reconstructing palaeoenvironments using the 'Nearest Living Relatives' approach (Woodward, 1987; McElwain & Chaloner, 1995; Sun, Chen & Li, 1999; Li, Wang & Sun, 2001).

## MATERIAL AND METHODS

Some of the leaves investigated in this study were collected from *G. pensilis* specimens in the arboretum of Guangzhou (23°11'N, 113°22'E), Guangdong Province in January 2002. The remaining leaves were studied from a mature tree in the arboretum of Hangzhou (30°15'N, 120°06'E), Zhejiang Province in November 2000 and August 2002 (Fig. 1). All the leaves were macerated in >30% hydrogen peroxide (H<sub>2</sub>O<sub>2</sub>) and 99% glacial acetic acid (CH<sub>3</sub>COOH) at a ratio of 1:1. Epi-

dermal photographs were taken under SEM (Hitachi S570) and LM (Olympus BX50).

The sizes of stomata were measured on both the abaxial and adaxial surfaces of linear, linear-subulate and scale-like leaves ( $N = 50$  on each surface). The numbers of subsidiary cells of a stoma were determined for 200 stomatal apparatus. Stomatal density is the number of stomata per unit area of the leaf surface. Stomatal index =  $100S/(E + S)$ , where  $S$  = number of stomata per unit area and  $E$  = number of epidermal cells of the same unit area. The areas used for calculating stomatal density and index were  $0.5 \times 0.3 \text{ mm}^2$  in linear leaves and  $0.5 \times 0.2 \text{ mm}^2$  in linear-subulate leaves. One hundred measurements of such areas were made on each of the abaxial and adaxial surfaces of linear and linear-subulate leaves. The values of stomatal size and parameters (mean  $\pm$  SD) were obtained from the leaves collected from Guangzhou and Hangzhou, and also from these populations combined. Statistical analyses (independent-samples  $t$ -test) were performed using SPSS v.10.0 software. Statistically significant differences were assumed when a two-tailed  $P$ -value was  $< 0.05$ . The values of CV ( $CV = SD/\text{mean}$ ) of stomatal density and index were obtained in order to compare intra-individual variation between stomatal density and index.

## LEAF DESCRIPTION AND COMPARISON

Trees of *G. pensilis* are semi-evergreen and monoecious. Their inflorescences develop in February to March, and seeds mature in October to November. Leaves are spirally arranged and comprise three morphotypes: linear, linear-subulate and scale-like. The linear leaves are flat, thin and two-ranked on annual branchlets of young trees and budding branchlets of mature trees (Fig. 2A). The linear-subulate leaves are quadrangular in cross-section and radially spreading on annual branchlets of mature trees (Fig. 2B). The branchlets with linear and linear-subulate leaves often fell off as a unit in winter. The scale-like leaves, relatively thick and persistent for 2–3 years, are distributed radially on main, perennial and fertile branches (Fig. 2C).

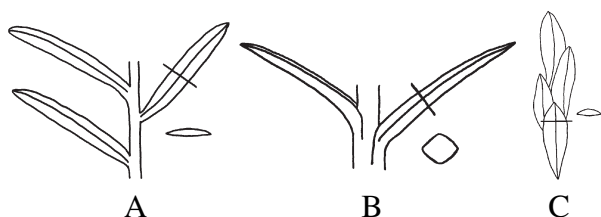

**Figure 2.** Leaves of *Glyptostrobus pensilis*. A, linear leaves; B, linear-subulate leaves; C, scale-like leaves.

The epidermal structures on both the abaxial and adaxial surfaces of the three morphotypes are very similar, which defines the leaves as amphistomatic. The epidermal cells are elongated within the non-stomatal areas, while they are rectangular with slightly rounded cell-corners on the intrastomatal zones (Figs 3, 5, 6). Pits can be seen clearly in the walls of epidermal cells both on non-stomatal areas (Fig. 4) and on intrastomatal zones (Figs 7, 8). In linear leaves, epidermal cell length in non-stomatal areas is  $131.6 \pm 31.1 \mu\text{m}$  (Guangzhou  $129.3 \pm 25.0 \mu\text{m}$ , Hangzhou  $134.0 \pm 36.4 \mu\text{m}$ ) and width is  $31.6 \pm 5.4 \mu\text{m}$  (Guangzhou  $31.1 \pm 5.6 \mu\text{m}$ , Hangzhou  $32.0 \pm 5.1 \mu\text{m}$ ), with the ratio of length to width (L:W) varying from 1.7:1 to 13.5:1 (on average 4.2:1). The statistical difference in epidermal cell size between Guangzhou and Hangzhou is not significant ( $P > 0.05$ ). The shape and size of epidermal cells on the stomatal areas are irregular in comparison with those of non-stomatal areas (Figs 3, 5, 6). The shape and size of epidermal cells in an area of high stomatal density are more irregular than in an area of lower stomatal density (Figs 7, 8).

Stomata on both the abaxial and adaxial surfaces of the three morphotypes of leaves are very similar in structure, and are also similar on the inner surfaces of both the abaxial and adaxial epidermis. On linear leaves, stomata are  $45.2 \pm 3.5 \mu\text{m}$  long and  $22.8 \pm 2.6 \mu\text{m}$  wide on their abaxial surface, and  $45.9 \pm 3.3 \mu\text{m}$  long and  $23.0 \pm 2.1 \mu\text{m}$  wide on their adaxial surface. On linear-subulate leaves, stomata are  $47.7 \pm 4.0 \mu\text{m}$  long and  $23.7 \pm 1.9 \mu\text{m}$  wide on their abaxial surfaces, and  $47.5 \pm 3.9 \mu\text{m}$  long and  $24.0 \pm 2.1 \mu\text{m}$  wide on their adaxial surfaces. On scale leaves, stomata are  $47.5 \pm 3.4 \mu\text{m}$  long and  $24.4 \pm 3.2 \mu\text{m}$  wide on their abaxial surface, and  $47.2 \pm 3.2 \mu\text{m}$  long and  $24.0 \pm 3.4 \mu\text{m}$  wide on their adaxial surfaces (Table 1). Stomata pores are elliptical (Figs 7, 8, 11). The long axes of stomatal pores are mostly parallel to the mid-vein in linear and linear-subulate leaves (Figs 3, 6), but most stomata are oblique or perpendicular to the mid-vein in scale-like leaves (Fig. 5). Guard cells have thickened walls, especially on outer margins. The thickened outer margins of cell walls are banana shape (Figs 7, 8). The thickened walls of guard cells form polar lamellae that produce protruding and curved ends at the two poles of the stomata (Figs 7, 8, 13). Commonly the stomata have five (49.5%) or six (32%) subsidiary cells, sometimes four (15%) and occasionally seven (3.5%). For Guangzhou and Hangzhou, respectively, 51% and 48% of the stomata have five subsidiary cells, 33% and 31% have six, 14% and 16% have four, and 2% and 5% have seven (Figs 7, 8, 12).

Stomata are located on each side of the mid-vein and distributed on both the abaxial and adaxial surfaces of leaves (Figs 3, 5, 6). The numbers of stomata



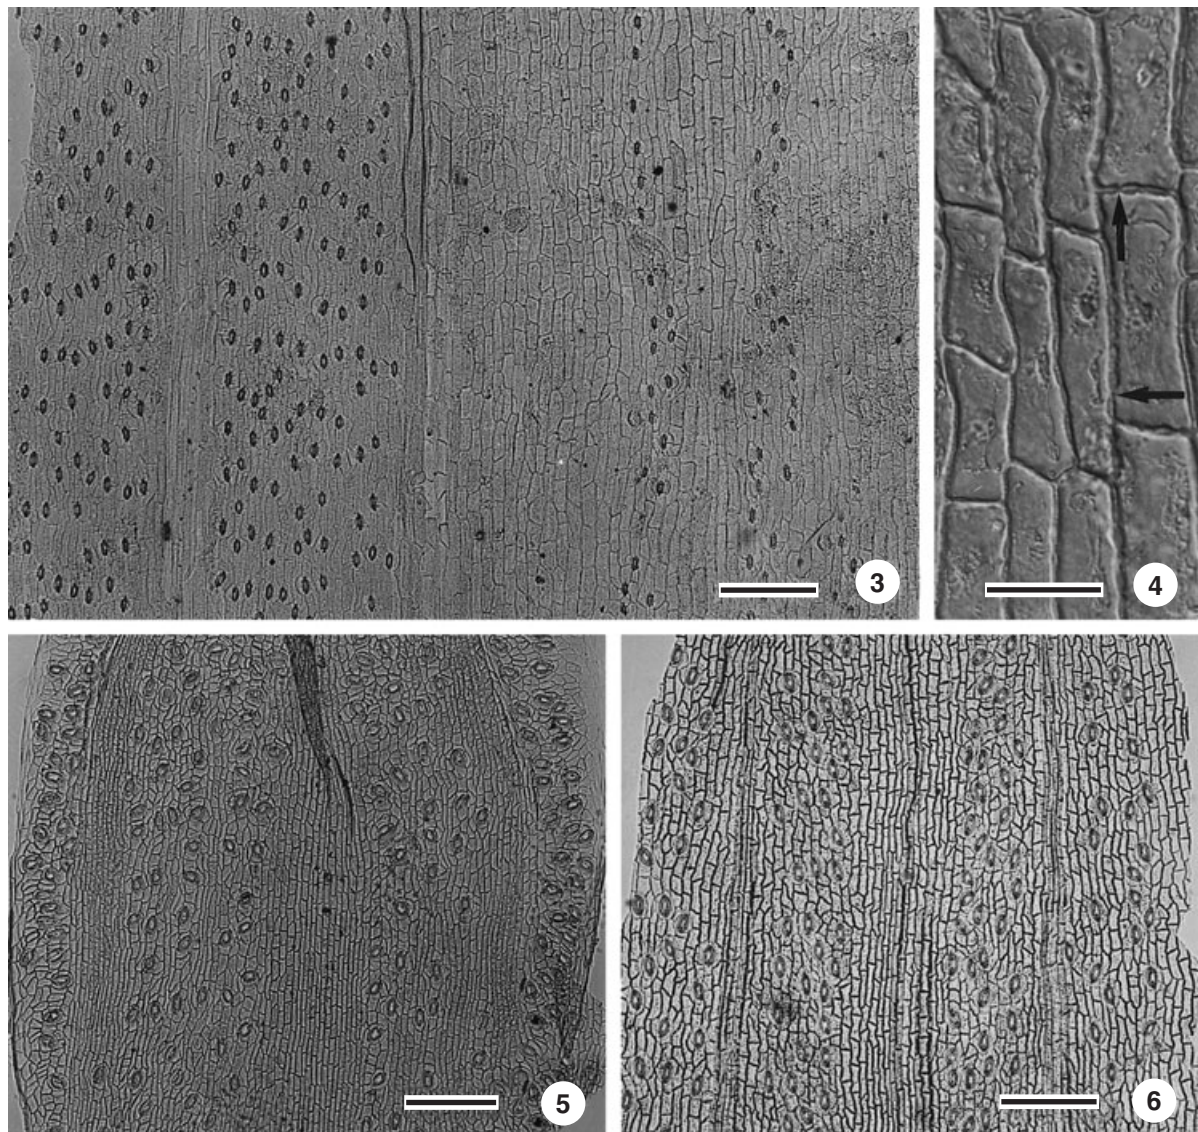

**Figures 3–6.** Epidermis of leaves of *Glyptostrobus pensilis*. Fig. 3. Epidermis of linear leaf collected from Guangzhou: left, abaxial surface; right, adaxial surface. Scale bar = 10  $\mu\text{m}$ . Fig. 4. Epidermal cells of linear-subulate leaf collected from Hangzhou. The arrows show the pits. Scale bar = 30  $\mu\text{m}$ . Fig. 5. Epidermis of scale-like leaf collected from Guangzhou. The middle part of the figure is the abaxial surface. Scale bar = 10  $\mu\text{m}$ . Fig. 6. Epidermis of linear-subulate leaf collected from Hangzhou. The middle part of the figure is the abaxial surface. Scale bar = 10  $\mu\text{m}$ .

on the abaxial surface are greater than those on the adaxial surface in linear leaves, as the stomatal band, about 0.3 mm in width, on the abaxial surfaces comprises 7–10 lines of stomata on each side of the mid-vein (Fig. 3, left), while the band on the adaxial surface has only 1–3 lines of stomata (Fig. 3, right). On each surface of the quadrangular linear-subulate leaves, the numbers and distribution of stomata are almost the same. The stomatal band comprises 4–6 lines of stomata and occupies about 0.2 mm in width (Fig. 6). There are 2–5 lines of stomata in each sto-

matal band on both the abaxial and adaxial surfaces of scale-like leaves (Fig. 5).

In the stomatal area, the stomatal density of linear leaves is  $136 \pm 24 \text{ mm}^{-2}$  on the abaxial surface and  $46 \pm 14 \text{ mm}^{-2}$  on the adaxial surface and that for linear-subulate leaves is  $118 \pm 26 \text{ mm}^{-2}$  on the abaxial surfaces and  $112 \pm 24 \text{ mm}^{-2}$  on the adaxial surfaces. The stomatal index of linear leaves is  $13.88 \pm 1.81$  on the abaxial surface and  $8.99 \pm 1.81$  on the adaxial surface, and for linear-subulate leaves  $13.32 \pm 2.32$  on the abaxial surfaces and  $13.06 \pm 2.14$  on the adaxial sur-

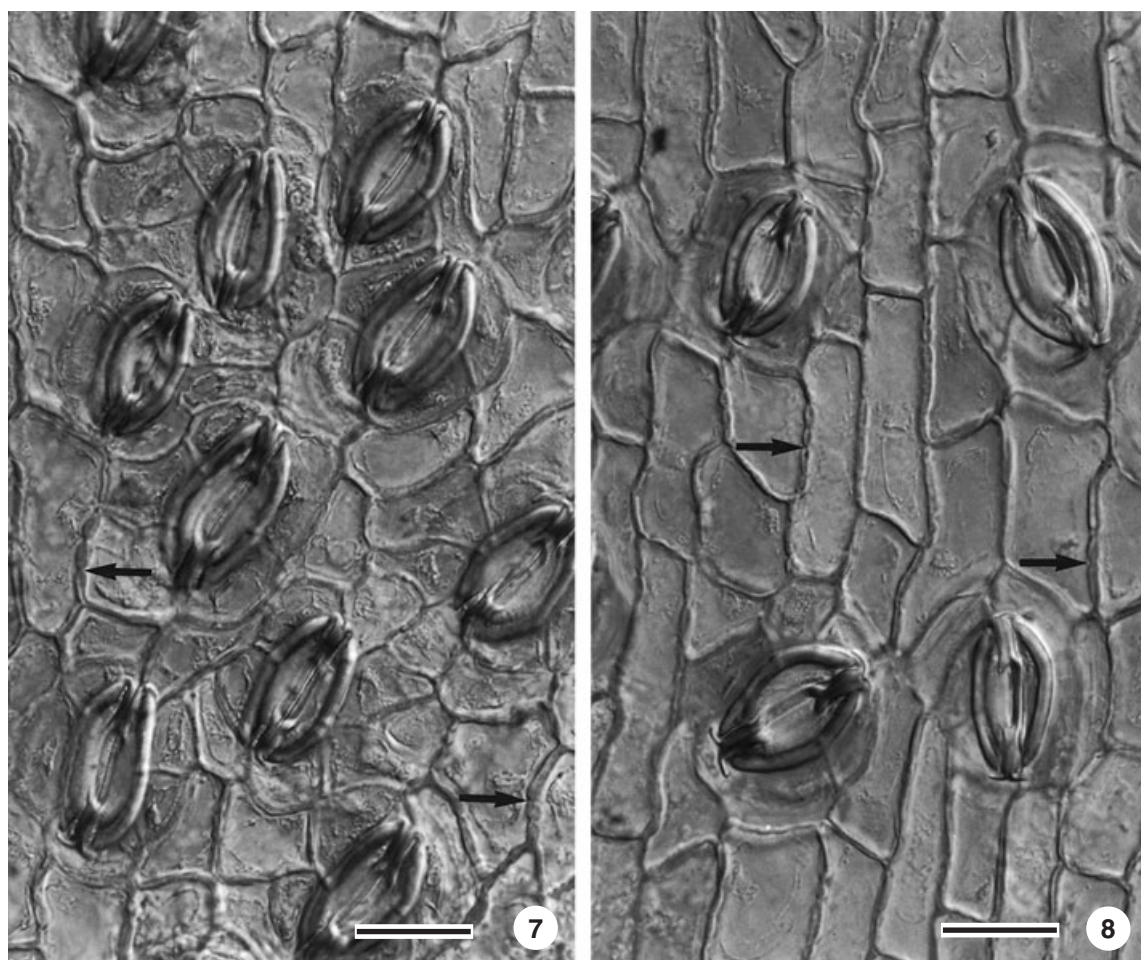

**Figures 7–8.** Stomata from linear-subulate leaves collected from Hangzhou. Arrows indicate pits. Scale bars = 30 µm.

**Table 1.** Stomatal size of *Glyptostrobus pensilis*

|                      | Linear leaves   |                 | Linear-subulate leaves |                 | Scale leaves    |                 |
|----------------------|-----------------|-----------------|------------------------|-----------------|-----------------|-----------------|
|                      | Abaxial surface | Adaxial surface | Abaxial surface        | Adaxial surface | Abaxial surface | Adaxial surface |
| Stomatal length (µm) | 45.1 ± 3.2 (G)  | 45.5 ± 3.3 (G)  | 45.4 ± 3.7 (G)         | 46.1 ± 3.2 (G)  | 46.0 ± 2.9 (G)  | 46.2 ± 2.2 (G)  |
|                      | 45.3 ± 3.8 (H)  | 46.2 ± 3.3 (H)  | 49.9 ± 2.9 (H)         | 48.9 ± 4.1 (H)  | 49.1 ± 3.1 (H)  | 48.3 ± 3.6 (H)  |
|                      | 45.2 ± 3.5 (C)  | 45.9 ± 3.3 (C)  | 47.7 ± 4.0 (C)         | 47.5 ± 3.9 (C)  | 47.5 ± 3.4 (C)  | 47.2 ± 3.2 (C)  |
| Stomatal width (µm)  | 22.9 ± 2.1 (G)  | 22.9 ± 1.7 (G)  | 23.1 ± 1.6 (G)         | 22.8 ± 1.5 (G)  | 21.9 ± 1.3 (G)  | 22.0 ± 1.4 (G)  |
|                      | 22.6 ± 3.1 (H)  | 23.2 ± 2.6 (H)  | 24.3 ± 2.0 (H)         | 25.1 ± 1.9 (H)  | 27.0 ± 2.3 (H)  | 26.0 ± 3.6 (H)  |
|                      | 22.8 ± 2.6 (C)  | 23.0 ± 2.1 (C)  | 23.7 ± 1.9 (C)         | 24.0 ± 2.1 (C)  | 24.4 ± 3.2 (C)  | 24.0 ± 3.4 (C)  |

G, Guangzhou, South China; H, Hangzhou, East China; values obtained from 50 leaf surface samples. C, combined Guangzhou and Hangzhou results obtained from 100 leaf surface samples.

faces (Table 2). The results of a *t*-test indicate that the statistical differences of stomatal parameters between the abaxial and adaxial surfaces of linear leaves from the same localities are significant ( $P < 0.05$ , Table 3). The statistical differences in stomatal density

between the abaxial and adaxial surfaces of linear-subulate leaves from Guangzhou are significant ( $P < 0.05$ , Table 3), but those from Hangzhou are not significant ( $P > 0.05$ , Table 3). The statistical differences of stomatal index between the abaxial and adax-



**Table 2.** Stomatal density and index of *Glyptostrobus pensilis*

|                                      | Linear leaves    |                 | Linear-subulate leaves |                  |
|--------------------------------------|------------------|-----------------|------------------------|------------------|
|                                      | Abaxial surface  | Adaxial surface | Abaxial surface        | Adaxial surface  |
| Stomatal density (mm <sup>-2</sup> ) | 138 ± 25 (G)     | 45 ± 15 (G)     | 112 ± 24 (G)           | 104 ± 19 (G)     |
|                                      | 135 ± 23 (H)     | 47 ± 13 (H)     | 125 ± 27 (H)           | 119 ± 25 (H)     |
|                                      | 136 ± 24 (C)     | 46 ± 14 (C)     | 118 ± 26 (C)           | 112 ± 24 (C)     |
| Stomatal index                       | 13.94 ± 2.07 (G) | 9.12 ± 1.99 (G) | 13.02 ± 2.20 (G)       | 12.52 ± 2.07 (G) |
|                                      | 13.82 ± 1.53 (H) | 8.86 ± 1.61 (H) | 13.62 ± 2.41 (H)       | 13.60 ± 2.09 (H) |
|                                      | 13.88 ± 1.81 (C) | 8.99 ± 1.81 (C) | 13.32 ± 2.32 (C)       | 13.06 ± 2.14 (C) |

G, Guangzhou, South China; H, Hangzhou, East China; values obtained from 100 leaf surface samples. C, combined Guangzhou and Hangzhou results obtained from 200 leaf surface samples.

**Table 3.** Statistical analyses of differences in stomatal parameters between the abaxial and adaxial leaf surfaces of *Glyptostrobus pensilis* from Guangzhou and Hangzhou

| Abaxial and adaxial surfaces of: | Guangzhou        |                | Hangzhou         |                |
|----------------------------------|------------------|----------------|------------------|----------------|
|                                  | Stomatal density | Stomatal index | Stomatal density | Stomatal index |
| Linear leaves                    | $P < 0.05$       | $P < 0.05$     | $P < 0.05$       | $P < 0.05$     |
| Linear-subulate leaves           | $P < 0.05$       | $P > 0.05$     | $P > 0.05$       | $P > 0.05$     |

**Table 4.** Statistical analyses of differences in stomatal parameters of *Glyptostrobus pensilis* from Guangzhou and Hangzhou

| Leaf type       | Surface | Stomatal density | Stomatal index |
|-----------------|---------|------------------|----------------|
| Linear          | Abaxial | $P > 0.05$       | $P > 0.05$     |
|                 | Adaxial | $P > 0.05$       | $P > 0.05$     |
| Linear-subulate | Abaxial | $P < 0.05$       | $P > 0.05$     |
|                 | Adaxial | $P < 0.05$       | $P < 0.05$     |

ial surfaces of linear-subulate leaves from the same localities are not significant ( $P > 0.05$ , Table 3). The differences in stomatal parameters of the same surfaces of linear leaves between Guangzhou and Hangzhou are not significant ( $P > 0.05$ ; Table 4). The statistical differences of stomatal density of the same surfaces of linear-subulate leaves between Guangzhou and Hangzhou are significant ( $P < 0.05$ ; Table 4). The statistical differences of stomatal index of the abaxial surfaces of linear-subulate leaves between Guangzhou and Hangzhou are not significant ( $P > 0.05$ , Table 4), but those of the adaxial surfaces of linear-subulate leaves are significant ( $P < 0.05$ ; Table 4). The values of CV of stomatal index are lower than those of stomatal

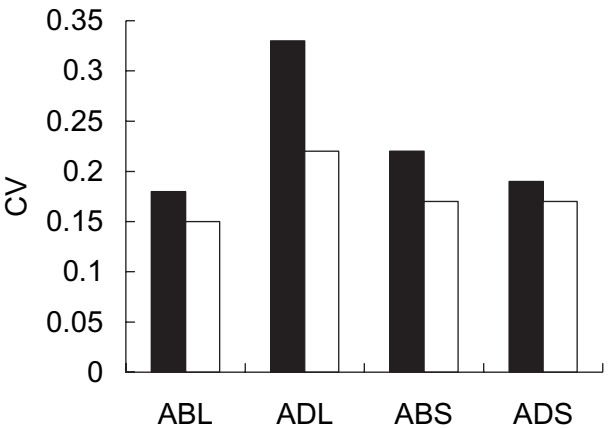

**Figure 9.** Coefficients of variability (CV) for stomatal density (■) and stomatal index (□) of abaxial (ABL) and adaxial (ADL) surfaces of the linear leaves, and abaxial (ABS) and adaxial surfaces (ADS) of linear-subulate leaves collected from Guangzhou.

density from the same areas on each surface of the same type leaves from the same localities, which indicate that the stomatal index shows a lower intra-individual variation and hence is more useful for palaeoecological reconstruction than stomatal density (Figs 9, 10).

## DISCUSSION

In genera of Taxodiaceae, some morphological features of branches, leaves and cones are similar (Stebbins, 1948; Chaney, 1951; Christophel, 1976; Ma & Gu, 2000). It is thus important to compare the epidermal structures of fossil species with their 'Nearest Living Relatives' (McElwain & Chaloner, 1995) in an attempt

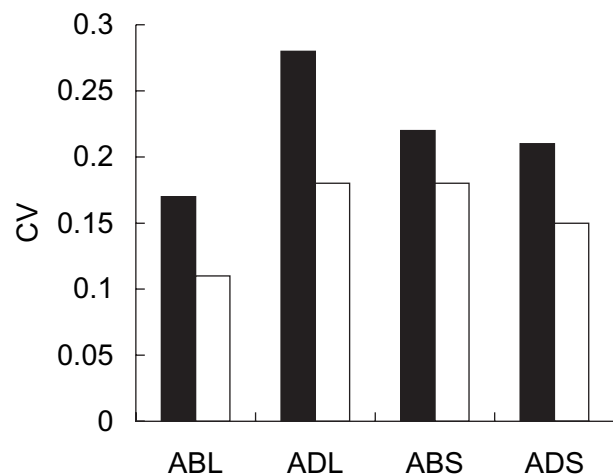

**Figure 10.** Coefficients of variability (CV) for stomatal density (■) and stomatal index (□) of abaxial (ABL) and adaxial (ADL) surfaces of the linear leaves, and abaxial (ABS) and adaxial surfaces (ADS) of linear-subulate leaves collected from Hangzhou.

to identify fossil leaf-compressions accurately. In order to distinguish fossil specimens of these genera, there is a need to study characters of both epidermal cells and stomata of leaves in living Taxodiaceae.

Previous descriptions of stomata of *G. pensilis* were very brief and solely for the abaxial surfaces of linear leaves (Zheng & Fu, 1978). Stomata of *G. pensilis* were also shown on both abaxial and adaxial surfaces of leaves (amphistomatic) with 4–7 subsidiary cells (Yao & Hu, 1982). Sveshnikova (1963) reported that *G. pensilis* has two types of leaves, subulate (or needle-like) and scale-like, both amphistomatic and with 4–6 (7) subsidiary cells. Florin (1922, 1931) recognized that the stomata have 4–6 subsidiary cells. In a recent comparative study on fossil *Glyptostrobus*, cuticular micropapillae were also found on cuticle of *G. pensilis*. These details of cuticle micromorphology are considerably better expressed in a fossil species in comparison with the living species *G. pensilis* (Vickulin *et al.*, 2003). According to the present work on *G. pensilis*, stomata are located on each side of the mid-vein and distributed on both the abaxial and adaxial surfaces of the three types of leaves. The number of stomata on the adaxial surface are fewer than those on the abaxial surface in linear leaves, but they are approximately the same on the different surfaces of the other two kinds of leaves. Most commonly the stomata have five or six subsidiary cells, and sometimes also four or seven.

Stomatal guard cells in *G. pensilis* have thickened walls. The lignified thickenings of guard cells were not

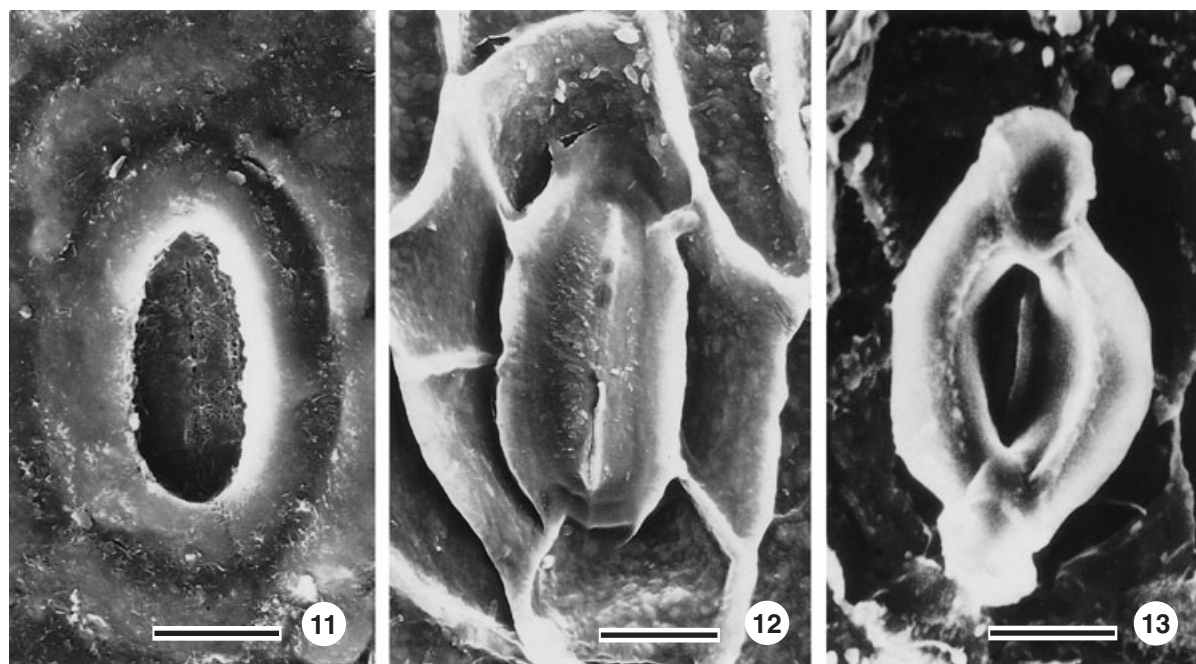

**Figures 11–13.** SEM images of stomata. Scale bars = 50  $\mu$ m. Fig. 11. Stomata of outer surface of a linear leaf collected from Hangzhou. Figs 12, 13. Stomata of inner surface of linear leaves collected from Hangzhou.

described in detail by previous researchers, exceptions being Boulter (1970, 1971) and Ma & Li (2002a, b), presumably because the thickenings were removed to some extent by the different maceration procedures (Isherwood, 1965; Alvin & Boulter, 1974; Kerp, 1990; Vickulin, 1999; Ma *et al.*, 2000b; Ma & Li, 2002a, b). Thickened walls of guard cells were also observed in *Sequoia* (Chaturvedi, 1993; Ma & Li, 2002a), *Metasequoia* (Liu *et al.*, 1999; Leng *et al.*, 2001; Ma & Zhang, 2003), *Taiwania* (Chaturvedi, 1993), *Taxodium* (Chaturvedi, 1993) and *Cryptomeria*, *Sequoiadendron*, *Arthrotaxis* (Boulter, 1970).

Recently, the authors (Vickulin *et al.*, 2003) have studied *G. europaeus* leafy shoots collected from the early Miocene Kaydagul Formation, central Kazakhstan. The shoots have two kinds of leaves, needle-like ones similar to the leaves of *Cryptomeria* and squamate ones similar to cupressoid forms. The former leaves are equivalent to linear-subulate leaves while the latter ones are described as scale-like leaves in this paper. No linear leaves were found in *G. europaeus*. The two kinds of leaves in the fossil are amphistomatic, with similarly organized epidermal cells and stomata on both the abaxial and adaxial surfaces of leaves. The epidermal cells are quadrangular, with the ratio L:W being 1–3 in *G. europaeus*. The ratio L:W of epidermal cells on non-stomatal areas of linear leaves of *G. pensilis* is on average 4.2. The stomatal structures of *G. europaeus* are the same as those of the living species of *G. pensilis*. Stomata usually have five subsidiary cells and very rarely four or six in *G. europaeus*, but very often five or six in *G. pensilis*. Stomatal pores are randomly orientated coaxial or at a slight angle towards the leaf axis, but very rare orthogonal orientation in *G. europaeus*, while the long axes of stomatal pores are mostly parallel to the mid-vein in linear and linear-subulate leaves, and oblique or perpendicular to the mid-vein in the scale-like leaves of *G. pensilis*. Similar stomatal patterns were also found in Eocene specimens of *G. europaeus* from Fushun, Liaoning Province, China (Florin, 1922; Editorial Group on Cenozoic Plants from China, 1978). There are no further details of leaf epidermis in fossil *Glyptostrobus* for comparison with those of living *G. pensilis* (Sveshnikova, 1963, 1967; Rouse, 1967; Alvin & Boulter, 1974; Chandrasekharan, 1974; Zhilin, 1974, 1989; Christophel, 1976; Stuchlik *et al.*, 1990; Worobiec, 1995; Vickulin & Zhilin, 1998).

Considering stomatal parameters and atmospheric CO<sub>2</sub> concentrations, a rise in CO<sub>2</sub> concentrations is correlated with a decline of stomatal parameters; thus, stomatal parameters can be used as an indication of ambient CO<sub>2</sub> concentrations (Woodward, 1987; Sun *et al.*, 1999). Stomatal density and index are equally likely to be inversely related to CO<sub>2</sub> concentration, but

the latter is not the only factor that influences the stomatal density and index. Stomatal density varies with changes in solar radiation, temperature and water status (Beerling, 1999). Stomatal index, in contrast, is sensitive only to factors affecting cell initiation, of which CO<sub>2</sub> appears to be one. Thus, even if stomatal density and stomatal index show similar responses for a given species, stomatal index should yield more accurate estimates of CO<sub>2</sub> levels (Royer, 2001).

The variation of stomatal parameters of linear leaves is smaller than that of linear-subulate leaves of *G. pensilis*, according to *t*-test results of stomatal parameters between Guangzhou and Hangzhou (Table 4). The variation of stomatal index of the abaxial surfaces is smaller than that of the index of the adaxial surface, and also is smaller than that of the density of the abaxial and adaxial surfaces in linear-subulate leaves according to *t*-test results (Table 4). Thus, in considering a correlation between stomatal parameters of *G. pensilis* and atmospheric CO<sub>2</sub> concentrations, the stomatal parameters of linear leaves should be selected.

Intra-leaf variations of stomatal density and index are present in many species (Royer, 2001). As we obtained the values of stomatal density and index of *G. pensilis* from the same areas of leaves in the present paper, the intra-individual variation of stomatal index is smaller than that of the density by comparing the CV of stomatal density with the CV of index (Figs 9, 10).

## ACKNOWLEDGEMENTS

The study was supported by the Foundation of the Chinese Academy of Sciences (nos KSCXZ-SW-101A and KZCX1-10-01) and a grant from the Lu Jia-Xi Foundation, Chinese Academy of Sciences. Special thanks are given to Professor Francis M. Hueber (Palaeobiological department of the Smithsonian Institution, Washington, DC) for providing a superb suggestion and modifying the text. We would also like to thank Li Qiang (Department of Biology, Liaocheng University, China) for technical assistance, Sun Jing-Tian (Centre for Analysis, Shandong Normal University, China) for assistance in SEM analysis, and Professor Chen De-Xin (Department of Mathematics, Liaocheng University, China) for help with data analysis.

## REFERENCES

- Alvin KL. 1970. The study of fossil leaves by scanning electron microscopy. *Scanning Electron Microscopy* **3**: 121–128.
- Alvin KL, Boulter MC. 1974. A controlled method of comparative study of taxodiaceous cuticles. *Botanical Journal of the Linnean Society* **69**: 277–286.
- Becker HF. 1969. Fossil plants of the Tertiary Beaverhead



- Basins in Southwestern Montana. *Palaeontographica, Abteilung B* **127**: 1–142.
- Beerling DJ. 1999.** Stomatal density and index: theory and application. In: Jones TP, Rowe NP, eds. *Fossil plants and spores: modern techniques*. London: The Geological Society, 251–256.
- Boulter MC. 1970.** Lignified guard cell thickenings in the leaves of some modern and fossil species of Taxodiaceae (Gymnospermae). *Biological Journal of the Linnean Society* **2**: 41–46.
- Boulter MC. 1971.** Fine details of some fossil and recent conifer leaf cuticles. In: Heywood VH, ed. *Scanning electron microscopy: systematic and evolutionary applications*. London: Academic Press, 211–236.
- Chandrasekharam A. 1974.** Megafossil flora from the Gangessee Locality, Alberta, Canada. *Palaeontographica, Abteilung B* **147**: 1–41.
- Chaney RW. 1951.** A revision of fossil *Sequoia* and *Taxodium* in western North America based on the recent discovery of *Metasequoia*. *Transactions of the American Philosophical Society, New Series* **40**(3): 171–262.
- Chaturvedi S. 1993.** Morphological, cuticular and anatomical studies of some members of Taxodiaceae. *Bionature* **13**(2): 127–131.
- Chen HB. 1992.** *Flora of Shandong Province 1*. Qingdao: Qingdao Publishing House, 197–200 (in Chinese).
- Chen LE, Yu SX, Miao RH. 1997.** Rare and endangered plants and their distribution in Guangdong. *Journal of Tropical and Subtropical Botany* **5**(4): 1–7 (in Chinese with English abstract).
- Christophel DC. 1976.** Fossil floras of the Smoky Tower Locality, Alberta, Canada. *Palaeontographica, Abteilung B* **157**: 1–43.
- Cutler DF, Alvin KL, Price DL. 1982.** *The plant cuticle*. Linnean Society Symposium Series 10. London: Academic Press, 461.
- Dorofeev PI. 1974.** On the history of the genus *Glyptostrobus* Endl. *Botanicheskii Zhurnal* **59**(1): 3–13.
- Editorial Group on Cenozoic plants from China. 1978.** *Fossil plants of China 3: Cenozoic*. Beijing: Science Press, 10–15 (in Chinese).
- Florin R. 1922.** Zur alttertiären Flora der südlichen Manschurei. *Palaeontologia Sinica Series A* **1**(1): 1–52.
- Florin R. 1931.** Untersuchungen zur Stammesgeschichte der Coniferales und Cordaitales. *Kungl Svenska Vetenskapsakademiens Handlingar (Series 5)* **10**: 1–588.
- Florin R. 1963.** The distribution of conifer and taxad genera in time and space. *Acta Horti Bergiani* **20**(4): 121–312.
- Guo SX. 2000.** New material of the late Cretaceous flora from Hunchun of Jilin, Northeast China. *Acta Palaeontologica Sinica* **39**(suppl.): 226–250 (in Chinese with English abstract).
- Guo SX, Chen JL. 1989.** Cenozoic floras and coal-accumulating environment in Himalayas and mountains areas. *Acta Palaeontologica Sinica* **28**(4): 512–521 (in Chinese with English abstract).
- Guo SX, Li HM. 1979.** Late Cretaceous flora from Hunchun of Jilin. *Acta Palaeontologica Sinica* **18**(6): 547–559 (in Chinese with English abstract).
- Guo SX, Sun ZH, Li HM, Dou YW. 1984.** Paleocene megafossil flora from Altai of Xinjiang. *Bulletin of the Nanjing Institute of Geology and Palaeontology, Academic Sinica* **8**: 119–146 (in Chinese with English abstract).
- Han LJ, Hu YX, Lin JX, Wang XP. 1997.** The biology and conservation of *Glyptostrobus pensilis* (a review). *Subtropical Plant Research Communication* **26**(1): 43–47 (in Chinese with English abstract).
- He CX, Tao JR. 1997.** A study on the Eocene flora in Yilan County, Heilongjiang. *Acta Phytotaxonomica Sinica* **35**(3): 249–256 (in Chinese with English abstract).
- Huang YQ. 1995.** The first listed rare and endangered species from Guangxi. *Guangxi Forestry Science* **24**(4): 211–214 (in Chinese).
- Isherwood FA. 1965.** Biosynthesis of lignin. In: Pridham JB, Swain T, eds. *Biosynthetic pathways in higher plants*. London: Academic Press, 133–146.
- Jiangsu Institute of Botany. 1977.** *Flora of Jiangsu 1*. Nanjing: Jiangsu People's Publishing House, 100–106 (in Chinese).
- Kerp H. 1990.** The study of fossil gymnosperms by means of cuticular analysis. *Palaios* **5**: 548–569.
- Kerp H, Krings M. 1999.** Light microscopy of cuticles. In: Jones TP, Rowe NP, eds. *Fossil plants and spores: modern techniques*. London: The Geological Society, 52–56.
- Leng Q, Yang H, Yang Q, Zhou JP. 2001.** Variation of cuticle micromorphology of *Metasequoia glyptostroboides* (Taxodiaceae). *Botanical Journal of the Linnean Society* **136**: 207–219.
- Li CS, Wang YF, Sun QG. 2001.** Climate analysis of endemic species – a novel method for quantitative analysis of global climate change since Tertiary. *Acta Botanica Sinica* **43**(2): 217–220 (in Chinese with English abstract).
- Li HM, Yang GY. 1984.** Miocene Qiuligou flora in Dunhua county, Jilin Province. *Acta Palaeontologica Sinica* **23**(2): 204–214 (in Chinese with English abstract).
- Li RW, Zhang HD. 2001.** A floristic analysis on the Gymnosperms of Sichuan. *Guihaia* **21**(3): 215–222 (in Chinese with English abstract).
- Liu YJ, Li CS, Wang YF. 1999.** Studies on fossil *Metasequoia* from north-east China and their taxonomic implications. *Botanical Journal of the Linnean Society* **130**: 267–297.
- Liu YC, Lu FY, Ou CH. 1994.** *Trees of Taiwan*. Monographic Publication 7. Taiwan: College of Agriculture, National Chung-Shing University, 62–70 (in Chinese).
- Ma QW, Gu FQ. 2000.** Comparative studies on morphological features of some genera in Taxodiaceae. *Chinese Bulletin of Botany* **17**(Special issue): 161–164 (in Chinese with English abstract).
- Ma QW, Li CS. 2002a.** Epidermal structures of *Sequoia sempervirens* (D. Don) Endl. (Taxodiaceae). *Taiwania* **47**(3): 194–202.
- Ma QW, Li CS. 2002b.** Characteristics of reference in classifying fossil plants of genera *Metasequoia* and *Sequoia* by epidermal features. *Journal of Wuhan Botanical Research* **20**(6): 413–416 (in Chinese with English abstract).
- Ma QW, Zhang JB. 2003.** Epidermal structures of *Metasequoia glyptostroboides* Hu et Cheng (Taxodiaceae). *Bulletin*

- of *Botanical Research* **23**(1): 32–35 (in Chinese with English abstract).
- Ma QW, Xu JX, Wang YF, Li CS. 2000a.** First evidence of *Sequoia* in the Miocene of Yunnan Province, China. *Acta Botanica Sinica* **42**(4): 438–440 (in Chinese with English abstract).
- Ma QW, Zhang JB, Wang YF, Li CS. 2000b.** Studies on cuticle of *Sequoia sempervirens*. In: Palaeobotanical Committee of Palaeontological and Botanical Society, China, ed. *Unpublished abstract of the Sixth Conference of the International Organization of Palaeobotany*. Qinhuangdao of Hebei, China. July 31–August 3, 2000. 81.
- Mai DH. 1995.** *Tertiäre Vegetationsgeschichte Europas*. Jena: Gustav Fischer Verlag, 248.
- McElwain JC, Chaloner WG. 1995.** Stomatal density and index of fossil plants track atmospheric carbon dioxide in the Palaeozoic. *Annals of Botany* **76**: 389–395.
- Page CN. 1990.** Coniferophytina. In: Kramer KU, Green PS, eds. *Pteridophytes and gymnosperms*. Berlin: Springer-Verlag, 282–361.
- Rouse GE. 1967.** A late Cretaceous plant assemblage from east-central British Columbia: I, fossil leaves. *Canadian Journal of Earth sciences* **4**: 1185–1196.
- Royer DL. 2001.** Stomatal density and stomatal index as indicators of paleoatmospheric CO<sub>2</sub> concentration. *Review of Palaeobotany and Palynology* **114**: 1–28.
- Ru YQ, Dai HT, Qiao GZ. 1999.** Experimental studies on cultivation of *Glyptostrobus pensilis* K. Koch. *Journal of Henan Forestry Science and Technology* **19**(3): 32–33 (in Chinese).
- Schneider W. 1990.** Floral succession in Miocene bogs of Central Europe. In: Knobloch E, Kvacek Z, eds. *Proceedings of the Symposium on Paleofloristic and Paleoclimatic Changes in the Cretaceous and Tertiary*. Prague: August 28–September 1, 1989. Prague: Geological Survey Publisher, 205–212.
- Shenyang Institute of Geology and Mineral Resources. 1980.** *Palaeontological Atlas of Northeast China 2: Mesozoic and Cenozoic*. Beijing: Geological Publishing House, 308–339 (in Chinese).
- Stebbins GL. 1948.** The chromosomes and relationships of *Metasequoia* and *Sequoia*. *Science* **108**: 95–98.
- Stockey RA, Rothwell GW, Falder AB. 2001.** Diversity among Taxodioid conifers: *Metasequoia foxii* sp. nov. from the Paleocene of central Alberta, Canada. *International Journal of Plant Sciences* **162**(1): 221–234.
- Stuchlik L, Szykiewicz A, Łancucka-Srodoniowa M, Zastawniak E. 1990.** Results of the hitherto palaeobotanical investigations of the Tertiary brown coal bed 'Bełchatów' (Central Poland). *Acta Palaeobotanica* **30**(1–2): 259–305.
- Sun QG, Chen LQ, Li CS. 1999.** Impact of changing atmospheric CO<sub>2</sub> concentration over the Phanerozoic on stomatal parameters of vascular land plants. *Chinese Science Bulletin* **44**(7): 577–582.
- Sveshnikova IN. 1963.** Atlas and a key for the identification of the living and fossil Sciadopityaceae and Taxodiaceae based on the structure of the leaf epidermis. In: Takhtajan AL, ed. *Paleobotany 4*. Proceedings of the Botanical Institute, Academy of Sciences USSR 8. Leningrad: Nauka, 207–237.
- Sveshnikova IN. 1967.** The Late Cretaceous conifers of the Soviet Union, I. Fossil conifers of the Viliuyian depression (syneclyne fold). In: Takhtajan AL, ed. *Paleobotany 6*. Proceedings of the Botanical Institute, Academy of Sciences USSR 8. Leningrad: Nauka, 177–203.
- Tao JR, Xiong XZ. 1986.** The latest Cretaceous flora of Heilongjiang Province and the floristic relationship between East Asia and North America. *Acta Phytotaxonomica Sinica* **24**(1–2): 1–15, 121–135 (in Chinese with English abstract).
- Vickulin SV. 1999.** Palaeogene leaf compressions of myrtaceous affinity from Pasekovo, Middle Russian Upland, southern European Russia. *Botanical Journal of the Linnean Society* **131**: 65–98.
- Vikulin SV, Zhilin SG. 1998.** *Structurally preserved leafy shoots of Glyptostrobus (Taxodiaceae) from the Kaydagul Formation of Turgay (Central Kazakhstan)*. Toporkovskiye Redings. Kazakhstan: Rudny Publishing House, 217–219.
- Vickulin SV, Ma QW, Zhilin SG, Li CS. 2003.** On cuticle compressions of *Glyptostrobus europaeus* (Taxodiaceae) from Kaydagul Formation (Lower Miocene) of Central Kazakhstan. *Acta Botanica Sinica* **45**(6): 673–680.
- Woodward FI. 1987.** Stomatal numbers are sensitive to increases in carbon dioxide from pre-industrial levels. *Nature* **327**: 617–618.
- Worobiec G. 1995.** A preliminary report on the lower Miocene leaf flora from the brown coal mine 'Bełchatów' (Central Poland). *Acta Palaeobotanica* **35**(2): 243–251.
- Xiong XZ. 1986.** Palaeocene flora from the Wuyun Formation in Jiayin of Heilongjiang. *Acta Palaeontologica Sinica* **25**(5): 571–576. (in Chinese with English abstract).
- Xu YB, Yu X. 1980.** A preliminary study of the growth of *Glyptostrobus pensilis* K. Koch. in the Pearl River Delta. *Journal of South China Agricultural College* **1**(4): 107–118 (in Chinese with English abstract).
- Xu XH, Li MP. 1959.** Ecology and distribution of *Glyptostrobus pensilis* K. Koch. *Journal of South China Teacher College* **3**: 84–99 (in Chinese).
- Yang JJ, Qi GF, Xu RH, Yang LM. 1996.** Studies on three gymnospermous fossil woods excavated from Wuhan area. *Liaoning Geology* **4**: 263–273.
- Yao BJ, Hu YS. 1982.** Comparative anatomy of conifer leaves. *Acta Phytotaxonomica Sinica* **20**(3): 275–294 (in Chinese with English abstract).
- Ying JS, Zhang YL. 1994.** *Endemic genera of Carpophytes in China*. Beijing: Science Press, 35–46 (in Chinese).
- Yu YF. 1994.** Taxonomic studies on the family Taxodiaceae. *Bulletin of Botanical Research* **14**(4): 369–382 (in Chinese with English abstract).
- Yu YF. 1995.** Origin, evolution and distribution of the Taxodiaceae. *Acta Phytotaxonomica Sinica* **33**(4): 362–389. (in Chinese with English abstract).
- Zheng WJ, Fu LG. 1978.** *China Vegetation 7*. Beijing: Science Press, 309–312 (in Chinese).
- Zhilin SG. 1974.** *The Tertiary flora of Plateaustjurt, Transcaspiia*. Leningrad: Nauka.
- Zhilin SG. 1989.** History of the development of the temperate forest flora in Kazakhstan (USSR) from the Oligocene to the early Miocene. *Botanical Review* **55**(4): 205–330.
